# Supplementary material for: The functional readthrough extension of malate dehydrogenase reveals a modification of the genetic code
Source: PubMed Central journal article supplement (PMC5133446; doi:10.1098/rsob.160246), 2016-11-23
Supplement: rsob160246supp1.pdf [file rsob160246supp1.pdf]

## Supplementary Material

# The functional readthrough extension of malate dehydrogenase reveals a modification of the genetic code

Julia Hofhuis<sup>1</sup>, Fabian Schueren<sup>1</sup>, Christopher Nötzel<sup>1,4</sup>,  
Thomas Lingner<sup>2</sup>, Jutta Gärtner<sup>1</sup>, Olaf Jahn<sup>3</sup>, Sven Thoms<sup>1,\*</sup>

<sup>1</sup> Department of Pediatrics and Adolescent Medicine,  
University Medical Center Göttingen, University of Göttingen,  
37075 Göttingen, Germany

<sup>2</sup> Microarray and Deep Sequencing Core Facility,  
University Medical Center Göttingen, University of Göttingen,  
37077 Göttingen, Germany

<sup>3</sup> Proteomics Group, Max-Planck-Institute of Experimental Medicine,  
37075 Göttingen, Germany

<sup>4</sup> Current Address: Program in Biochemistry and Structural Biology,  
Cell and Developmental Biology, and Molecular Biology,  
Weill Cornell Graduate School of Medical Sciences,  
New York, NY, United States of America

\* Correspondence: Email: [sven.thoms@med.uni-goettingen.de](mailto:sven.thoms@med.uni-goettingen.de)

## Supplementary Figures S1 – S6

## Supplementary Tables S1 – S3

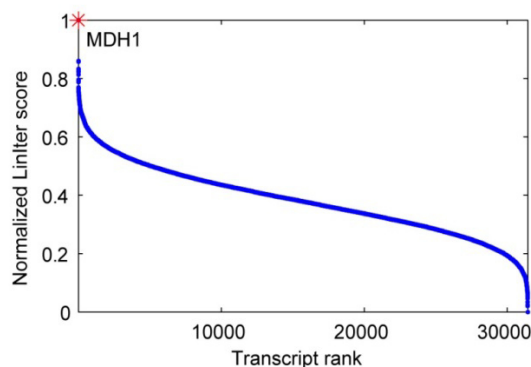

**Supplementary Figure S1. Genomic distribution of readthrough propensity.** Positively scaled and normalized Linlter scores ( $RTP^+$ ) of the 31,000 unique SCCs are plotted versus the transcript rank. Linlter: regression coefficients for the iterative model considering all 12 stop context positions.

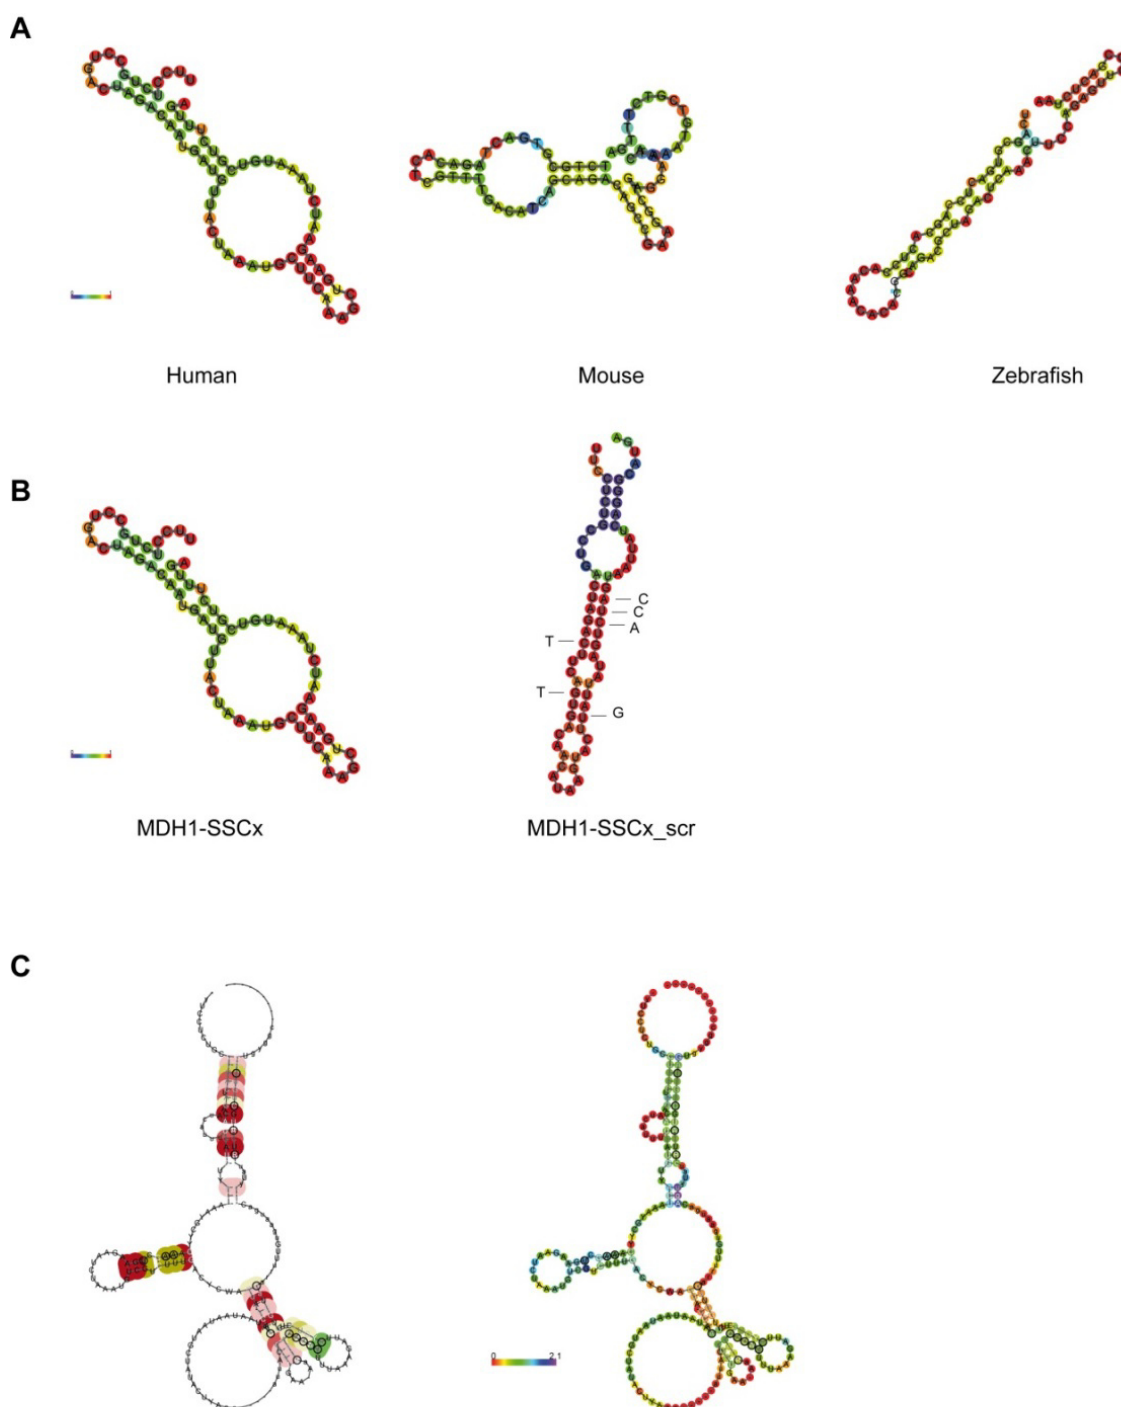

**Supplementary Figure S2. Lack of conservation in RNA structural elements in the readthrough extension of vertebrate MDH1x.** (A) mRNA structure prediction was performed with RNAfold Web Server using nucleotides from position -10 up to the second stop codon. MDH1 extensions shown: Human (*Homo sapiens*), Mouse (*Mus musculus*), and Zebra fish (*Danio rerio*). (B) mRNA structure prediction of MDH1-SSCx and MDH1-SSCx with scrambled extension (MDH1-SSCx\_scr). (C) Conserved predicted secondary structure based on alignment of the mammalian MDH1 3'UTRs (nucleotides -10 up to +180, see also alignment in Supplementary Fig. S3) using RNAfold Web

Server. Left: structure highlighted conserved elements like in Supplementary Fig. S3, right: base-pair probabilities.

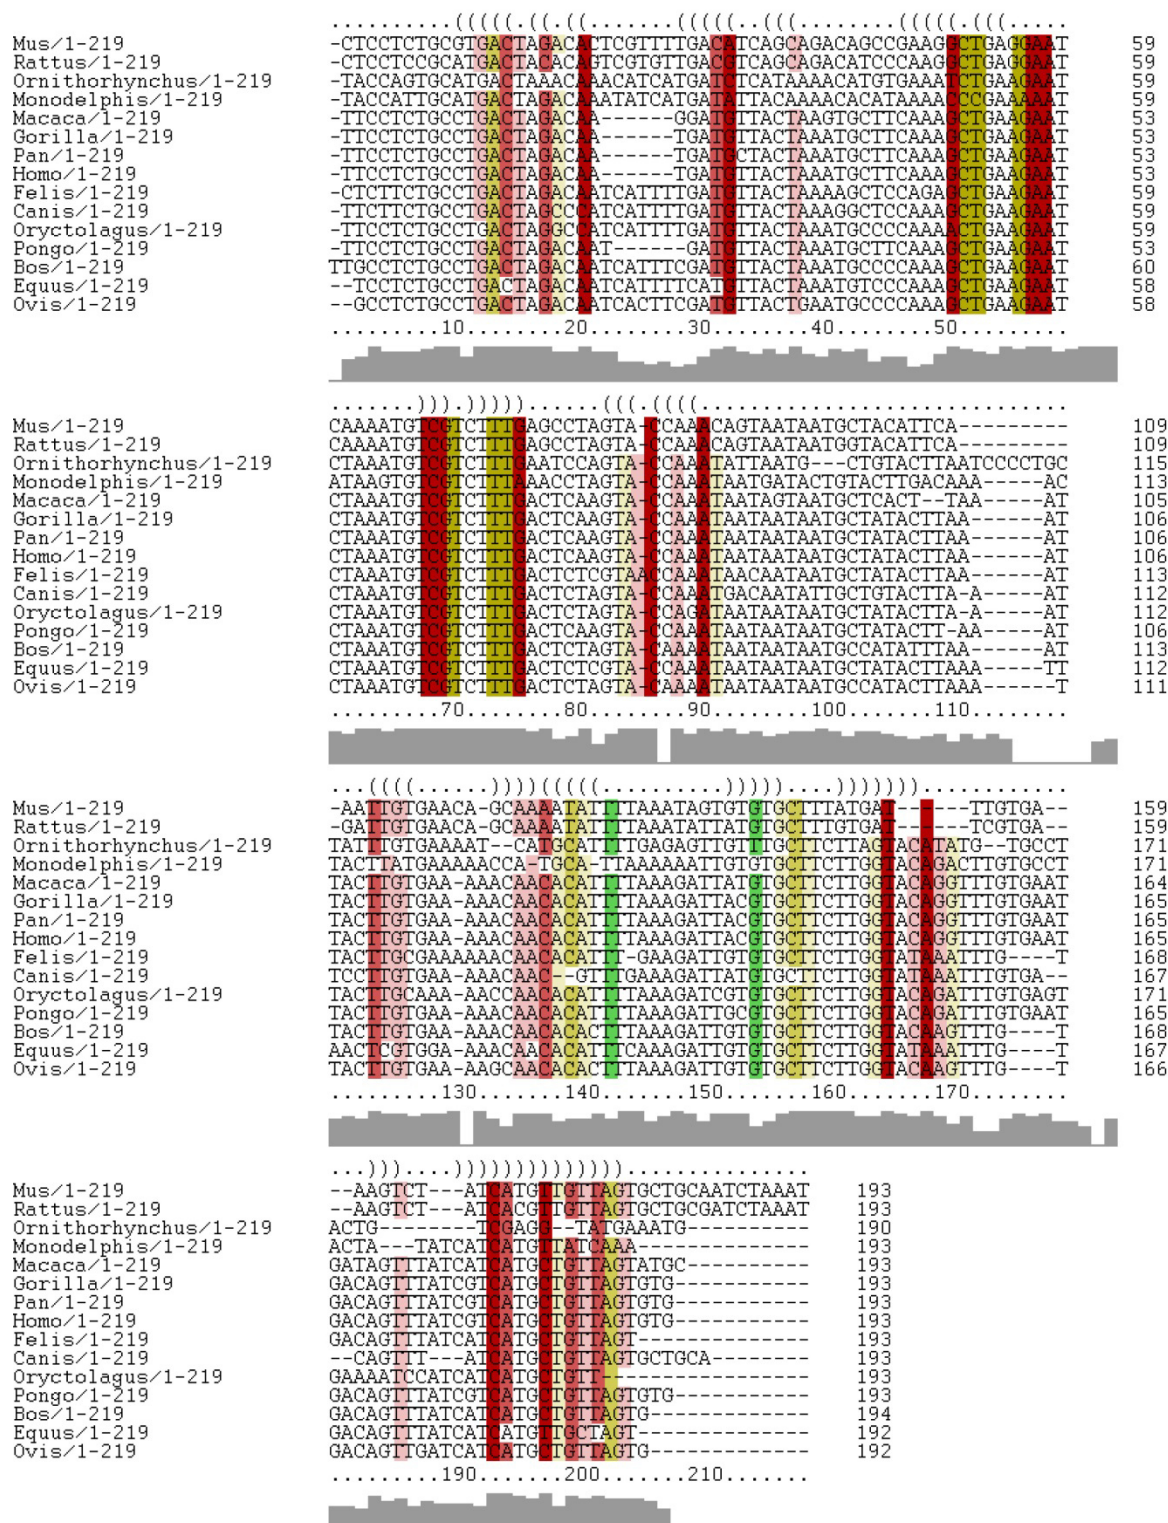

**Supplementary Figure S3. Structure annotated alignment of mammalian MDH1 3'UTRs.** Mammalian MDH1 3'UTRs (nucleotides -10 to +180) were aligned using Multiple Sequence Alignment Tool Clustal Omega and the alignment was then used for prediction of consensus secondary structures (RNAfold Web Server). Dot-bracket notation shows the optimal secondary structure with a minimum free energy.

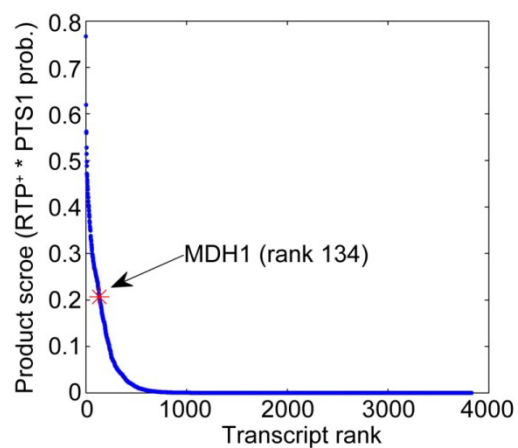

**Supplementary Figure S4. Genomic distribution of product score.** Product score of scaled and normalized LINiter readthrough propensity scores (RTP<sup>+</sup>) and PTS1 targeting probabilities plotted versus the rank of the transcript for the first 4000 out of 31,000 unique SCCs.

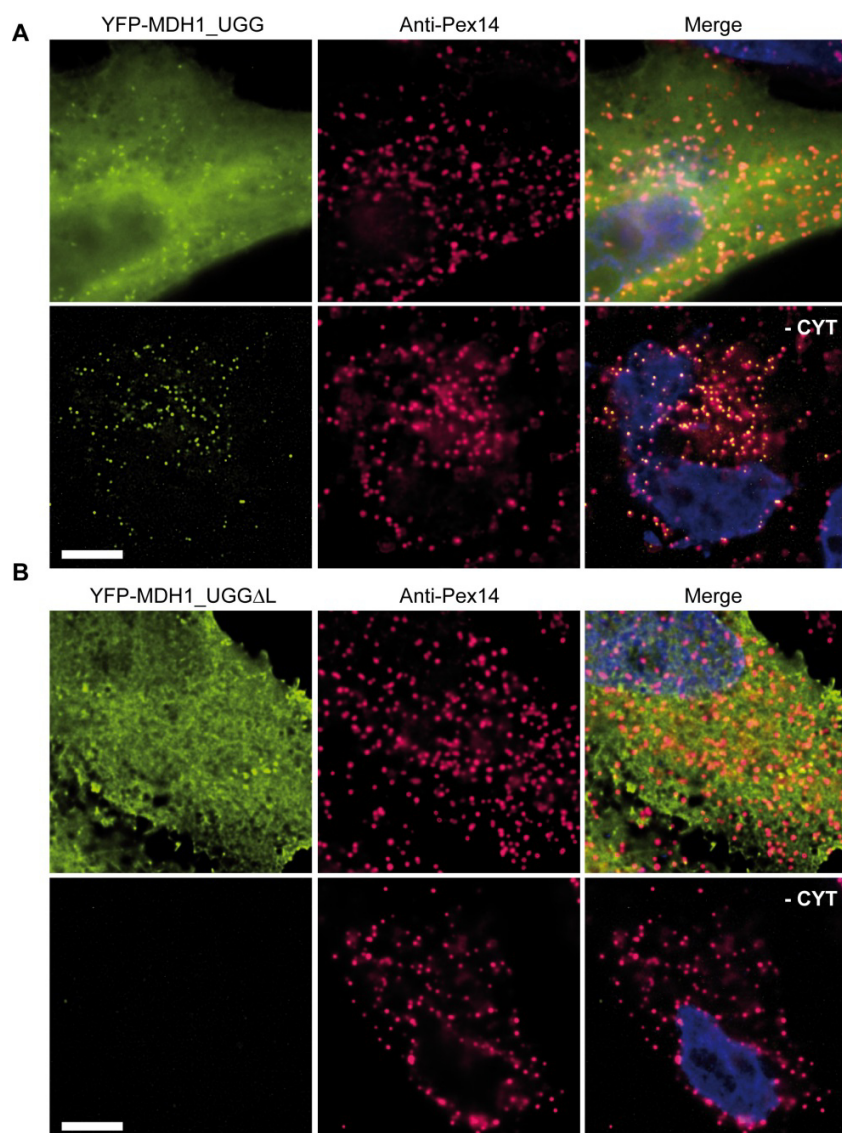

(Supplementary Figure S5)

**Supplementary Figure S5. MDH1x targets to the peroxisome by translational readthrough and a hidden peroxisomal targeting signal type1 (PTS1).** (A) Direct immunofluorescence microscopy of transfected HeLa cells. YFP-MDH1\_UGG localizes to the cytoplasm and peroxisomes. Removal of cytosol (- CYT) after digitonin treatment allows visualization of the peroxisomal localization of MDH1. (B) Peroxisomal targeting of MDH1 is dependent on the hidden PTS1 CRL in the extension. Deletion of leucine ( $\Delta L$ ) in CRL blocks import of MDH1 into peroxisomes. Scale bar: 10  $\mu\text{m}$

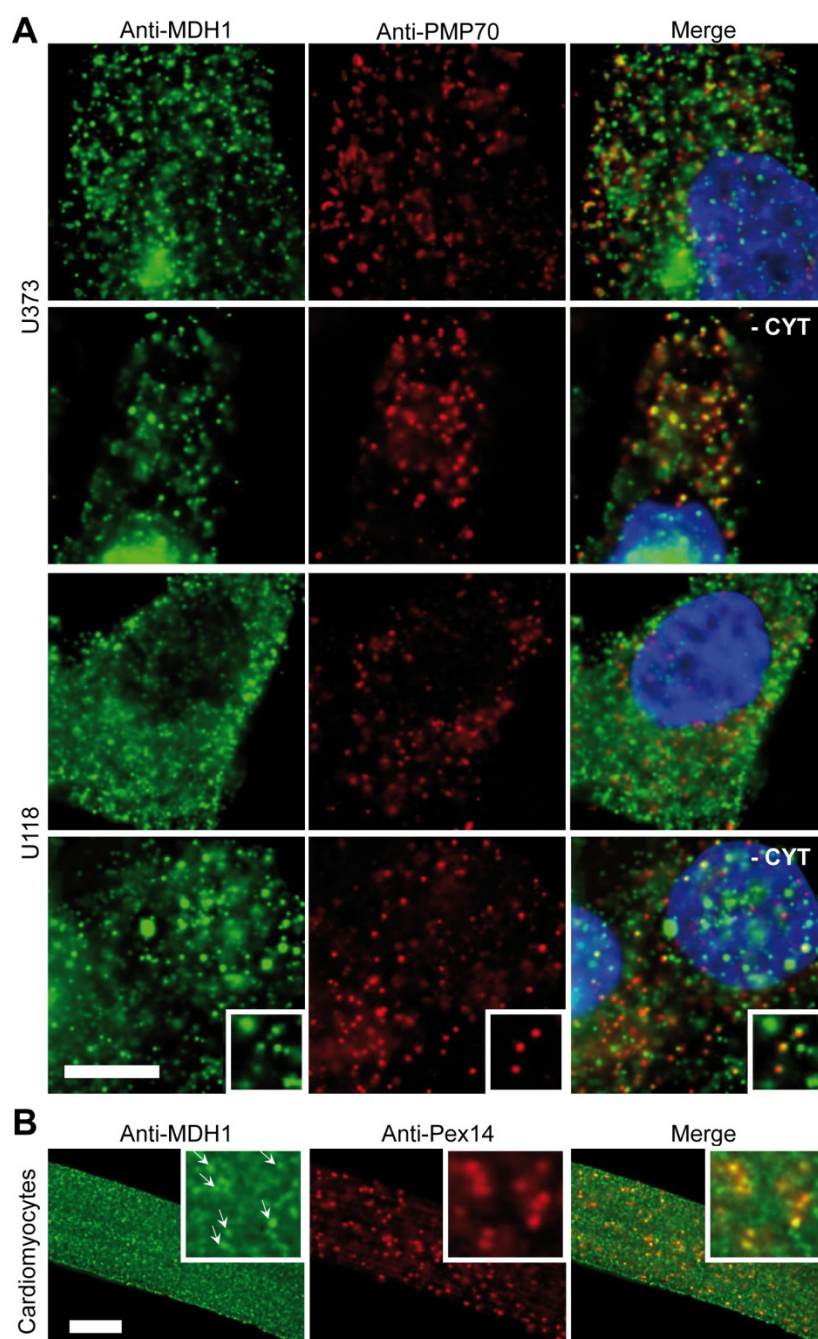

**Supplementary Figure S6. Endogenous MDH1 localizes to peroxisomes in glioblastoma cells and murine cardiomyocytes.** Immunofluorescence with anti-MDH1 and anti-Pex14 or anti-PMP70 antibodies. (A) Endogenous MDH1 shows mainly cytosolic localization in U118 and U373 cells. Detection of colocalization of MDH1 with the peroxisomal marker PMP70 after removal of cytosol (-CYT). (B) In murine cardiomyocytes MDH1 colocalizes with Pex14 on top of the cytosolic localization of MDH1. Arrows indicate peroxisomal localization of MDH1. Scale bars: 10  $\mu\text{m}$ .

|                      | Amino acids detected in this study |                  |                              |     |                 | Amino acids detected by other studies using eukaryotic translation systems |                       |                      |
|----------------------|------------------------------------|------------------|------------------------------|-----|-----------------|----------------------------------------------------------------------------|-----------------------|----------------------|
|                      | Peptide                            | Intensity [a.u.] | $\Delta M(\text{rel})$ [ppm] | b-y | RMS error [ppm] | Feng et al., 1990                                                          | Geller and Rich, 1980 | Chittum et al., 1998 |
| <b>Arginine</b>      | (K) ESAFEFLSSAR(L)                 | 31040            | 2.97                         | 11  | 4.81            | x                                                                          |                       | x                    |
| <b>Tryptophan</b>    | (K) ESAFEFLSSAWLDNDVTK(C)          | 20765            | 3.00                         | 7   | 11.07           | x                                                                          | x                     | x                    |
| <b>Cysteine</b>      | (K) ESAFEFLSSACLNDNDVTK(C)         | 1455             | -1.32                        | 4   | 15.62           | x                                                                          |                       | x                    |
| <b>Glutamine</b>     | (K) ESAFEFLSSAQLNDNDVTK(C)         | 836              | -6.67                        | 2   | 16.79           |                                                                            |                       |                      |
| <b>Phenylalanine</b> | (K) ESAFEFLSSAPLDNDVTK(C)          | 816              | -2.60                        | 3   | 5.03            |                                                                            |                       |                      |

**Supplementary Table S1. Mass spectrometry detection of amino acids encoded by stop codon.**

Intensity (in arbitrary units, a. u.), relative precursor mass deviation ( $\Delta M$ ), fragment count (b-y ions) and fragment mass deviation (RMS error) of peptides detected in our study and table of amino acids identified in other studies that used eukaryotic translation systems.

| PST number | Name                    | Source                  |
|------------|-------------------------|-------------------------|
|            | pEYFP-C1                | Thermo Scientific       |
|            | pcDNA3.1/Myc-His(-)A    | Thermo Scientific       |
|            | pEXP-N-Venus            | Anja Muntau lab         |
|            | pENTR/D-TOPO            | Thermo Scientific       |
| 1226       | pEXP-N-Venus-PTS1-ACOX3 | (Schueren et al., 2014) |
| 1360       | pDRV L                  | (Schueren et al., 2014) |
| 1385       | pDRV L-LDHB-SCC         | (Schueren et al., 2014) |
| 1435       | pDRV L-MDH1-SCC         | (Schueren et al., 2014) |
| 1436       | pEYFP-C1-MDH1x          | This study              |
| 1443       | pcDNA3.1-HA-MDH1x-myc   | This study              |
| 1473       | pDRV L-MDH1 [TAA CTA]   | This study              |
| 1474       | pDRV L-MDH1 [TAG CTA]   | This study              |
| 1475       | pDRV L-MDH1 [TAA TTA]   | This study              |
| 1476       | pDRV L-MDH1 [TGA TTA]   | This study              |
| 1479       | pDRV L-MDH1 [TGA CCA]   | This study              |

|      |                              |            |
|------|------------------------------|------------|
| 1480 | pDRVL-MDH1 [TGA CTT]         | This study |
| 1481 | pDRVL-MDH1 [UGA CTG]         | This study |
| 1482 | pEXP-N-Venus-PTS1-human      | This study |
| 1483 | pEXP-N-Venus-PTS1-zebrafinch | This study |
| 1502 | pDRVL-MDH1 [UGA AUA]         | This study |
| 1508 | pcDNA3.1-HA-MDH1x_TGG-myc    | This study |
| 1514 | pEYFP-C1-MDH1TGGx            | This study |
| 1521 | pDRVL-MDH1x                  | This study |
| 1523 | pDRVL-MDH1x_TGG              | This study |
| 1525 | pDRVL-MDH1_Δ26               | This study |
| 1526 | pDRVL-MDH1_Δ26_TGG           | This study |
| 1535 | pEYFP-C1-MDH1TAAx            | This study |
| 1536 | pEYFP-C1-MDH1TGGx_ΔL         | This study |
| 1581 | pDRVL-MDH1x_scr              | This study |
| 1582 | pDRVL-MDH1TGGx_scr           | This study |

**Supplementary Table S2. DNA constructs used in this study.**

| Oligo | Name                 | Sequence 5'-3'                                                                   |
|-------|----------------------|----------------------------------------------------------------------------------|
| JH77  | DR-MDH1-[TGAATA]_for | GTCACCGTTCCTCTGCCTGAATAGACAATGT                                                  |
| JH78  | DR-MDH1-[TGAATA]_rev | CCGGACATTGTCTATTCAGGCAGAGGAACG                                                   |
| JH102 | MDH1TGG_ΔL_rev       | GCGCGGATCCTCAACGACATTTAGATTCTTCAGC                                               |
| JH103 | MDH1TAA_for          | GTGCTTTTGAATTTCTTTCTCTGCCTAACTAGACAATGATGTTACTAA<br>ATGCTTC                      |
| JH104 | MDH1TAA_rev          | GAAGCATTTAGTAACATCATTGTCTAGTTAGGCAGAGGAAAGAAATTCA<br>AAAGCAC                     |
| JH105 | DR-MDH1x_for         | GTCACCGTTCCTCTGCCTGACTAGACAATGATGTTACTAAATGCTTCAA<br>AGCTGAAGAATCTAAATGTCGCTCTGT |
| JH106 | DR-MDH1x_rev         | CCGGACAAGACGACATTTAGATTCTTCAGCTTTGAAGCATTTAGTAACA<br>TCATTGTCTAGTCAGGCAGAGGAACG  |
| JH109 | DR-MDH1TGGx_for      | GTCACCGTTCCTCTGCCTGGCTAGACAATGATGTTACTAAATGCTTCAA<br>AGCTGAAGAATCTAAATGTCGCTCTGT |
| JH110 | DR-MDH1TGGx_rev      | CCGGACAAGACGACATTTAGATTCTTCAGCTTTGAAGCATTTAGTAACA<br>TCATTGTCTAGCCAGGCAGAGGAACG  |
| JH113 | DR-MDH1xΔ26_for      | GTCACCGTTCCTCTGCCTGACTAGACAATGATGTTACTAAATGCTTCAT                                |

|         |                            |                                                                              |
|---------|----------------------------|------------------------------------------------------------------------------|
| JH114   | DR-MDH1x $\Delta$ 26_rev   | CCGGATGAAGCATTTAGTAACATCATTGTCTAGTCAGGCAGAGGAACG                             |
| JH137   | DR-MDH1x-scr_for           | GTCACCGTTCCTCTGCCTGACTAGACTTCAGTGACAACATAAGTACTTATTATAGTCTAGTAATTATCAGGGCAGT |
| JH138   | DR-MDH1x-scr_rev           | CCGGACTGCCCTGATAATTACTAGACTATAATAAGTACTTATGTTGTCACCTGAAGTCTAGTCAGGCAGAGGAACG |
| JH139   | DR-MDH1TGGx-scr_for        | GTCACCGTTCCTCTGCCTGGCTAGACTTCAGTGACAACATAAGTACTTATTATAGTCTAGTAATTATCAGGGCAGT |
| JH140   | DR-MDH1TGGx-scr_rev        | CCGGACTGCCCTGATAATTACTAGACTATAATAAGTACTTATGTTGTCACCTGAAGTCTAGCCAGGCAGAGGAACG |
| OST1192 | EcoRI-MDH1x_for            | GCGCGAATTCTATGTCTGAACCAATCAGAG                                               |
| OST1193 | MDH1x-BamHI_rev            | GCGCGGATCCCTCAAAGACGACATTTAGATTCT                                            |
| OST1204 | NheI-HA tag-MDH1           | GCGCGCTAGCATGTACCCATACGATGTTCCAGATTACGCTTCTGAACCAATCAGAGTCC                  |
| OST1205 | BamHI-MDH1x-wo_second_STOP | GCGCGGATCCAAGACGACATTTAGATTCTTC                                              |
| OST1231 | MDH1TGG-mut_for            | GCTTTTGAATTTCTTTCTCTGCCTGGCTAGACAATGATGTTAC                                  |
| OST1232 | MDH1TGG-mut_rev            | GTAACATCATTGTCTAGCCAGGCAGAGGAAAGAAATTCAAAAGC                                 |
| OST1245 | MDH1-human-PTS1_for        | CACCTTCAAAGCTGAAGAATCTAAATGTCGTCTTTGA                                        |
| OST1246 | MDH1-human-PTS1_rev        | TCAAAGACGACATTTAGATTCTTCAGCTTTGAAGGTG                                        |
| OST1247 | MDH1-zebra finch-PTS1_for  | CACCTTCAGAGTGAAGAATCGAAAAGCCGTCTGTAG                                         |
| OST1248 | MDH1-zebra finch-PTS1_rev  | CTACAGACGGCTTTTCGATTCTTCCACTCTGAAGGTG                                        |
| OST1463 | DR-MDH1-[TAA CTA]_for      | GTCACCGTTCCTCTGCCTAACTAGACAATGT                                              |
| OST1464 | DR-MDH1-[TAA CTA]_rev      | CCGGACATTGTCTAGTTAGGCAGAGGAACG                                               |
| OST1465 | DR-MDH1-[TAG CTA]_for      | GTCACCGTTCCTCTGCCTAGCTAGACAATGT                                              |
| OST1466 | DR-MDH1-[TAG CTA]_rev      | CCGGACATTGTCTAGCTAGGCAGAGGAACG                                               |
| OST1467 | DR-MDH1-[TAA TTA]_for      | GTCACCGTTCCTCTGCCTAATTAGACAATGT                                              |
| OST1468 | DR-MDH1-[TAA TTA]_rev      | CCGGACATTGTCTAATTAGGCAGAGGAACG                                               |
| OST1469 | DR-MDH1-[TGA TTA]_for      | GTCACCGTTCCTCTGCCTGATTAGACAATGT                                              |
| OST1470 | DR-MDH1-[TGA TTA]_rev      | CCGGACATTGTCTAATCAGGCAGAGGAACG                                               |
| OST1475 | DR-MDH1-[TGA CCA]_for      | GTCACCGTTCCTCTGCCTGACCAGACAATGT                                              |
| OST1476 | DR-MDH1-[TGA CCA]_rev      | CCGGACATTGTCTGGTCAGGCAGAGGAACG                                               |
| OST1477 | DR-MDH1-[TGA CTT]_for      | GTCACCGTTCCTCTGCCTGACTTGACAATGT                                              |
| OST1478 | DR-MDH1-[TGA CTT]_rev      | CCGGACATTGTCAAGTCAGGCAGAGGAACG                                               |
| OST1479 | DR-MDH1-[TGA CTG]_for      | GTCACCGTTCCTCTGCCTGACTGGACAATGT                                              |
| OST1480 | DR-MDH1-[TGA CTG]_rev      | CCGGACATTGTCCAGTCAGGCAGAGGAACG                                               |

**Supplementary Table S3. Oligonucleotides used in this study. DR, dual reporter.**
